# Supplementary material
Source: PubMed Central journal article supplement (PMC5124007)
Supplement: 11302_2016_9530_MOESM1_ESM.pdf [file 11302_2016_9530_MOESM1_ESM.pdf]

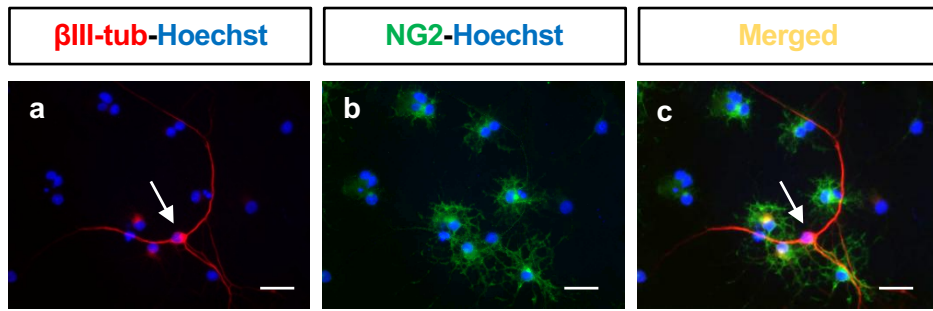

Supplementary Fig. 1: Split fluorescence channels relative to picture in Figure 3D, showing that a typical bipolar  $\beta$ III-tubulin-positive cell (arrow;  $\beta$ III-tub, red in **a** and **c**) does not express NG2 (green in **b** and **c**). Scale bars: 100  $\mu$ m.
